# Supplementary material
Source: publisher figshare collection journal article supplement (https://acs.figshare.com/ndownloader/files/3812707)
Supplement: Supplementary file 1 [file 3812707]

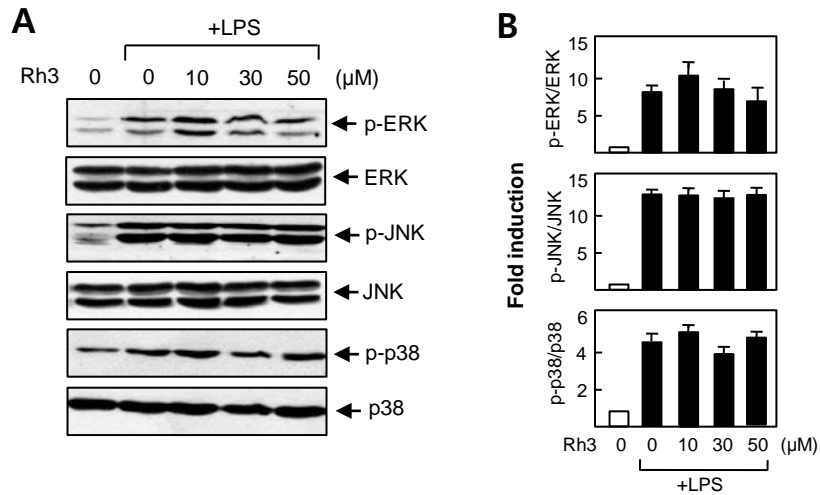

**Supplementary Fig. 1** Effect of Rh3 on the phosphorylation of three types of MAP kinases in LPS-stimulated BV2 cells. (A) Cells were treated with Rh3 for 1 h before stimulation with LPS (100 ng/ml) for 30 min, and were subjected to immunoblot analysis using antibodies against the phospho- or total forms of JNK, ERK, and p38. (B) Quantification of Western blot data (n=3). Levels of the active forms of MAPKs were normalized with respect to the levels of the total form of MAPKs, and then were expressed as relative fold changes compared with the MAPK levels in control samples.

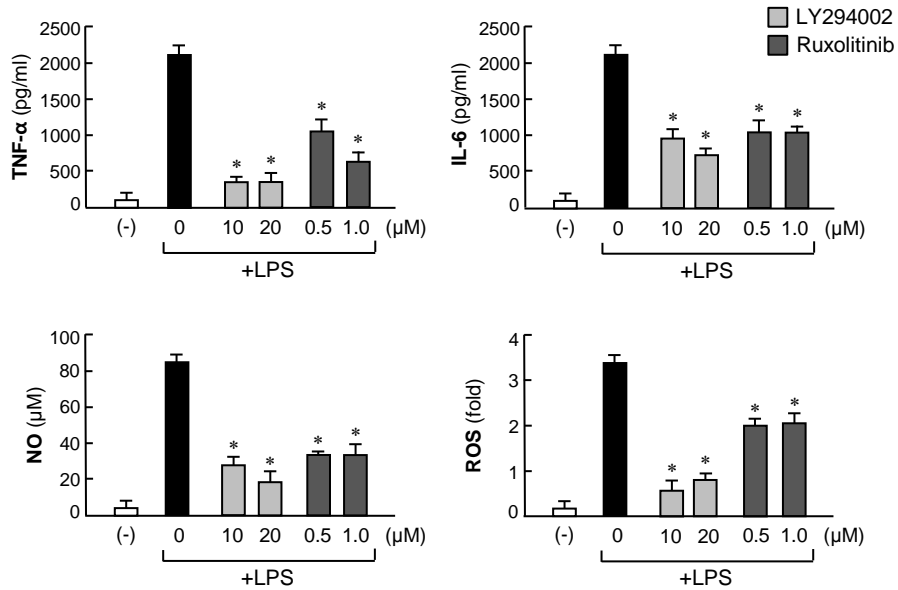

**Supplementary Fig. 2:** Effect of PI3K/Akt or JAK/STAT-specific inhibitor on TNF- $\alpha$ , IL-6, NO, and ROS production in LPS-stimulated BV2 cells. Cells were incubated with indicated concentrations of PI3K/Akt inhibitor (LY294002) or JAK/STAT inhibitor (Ruxolitinib) in the presence of LPS for 24 h, and the amounts of TNF- $\alpha$ , IL-6, and NO released into the media were determined. Intracellular ROS levels were measured by DCF-DA method. Values are the mean  $\pm$  S.E.M. of three independent experiments. \* $P < 0.05$ ; significantly different from LPS-treated cells.
